# Supplementary figures and images for: Membrane-anchored intracellular insulin receptor or insulin-like growth factor-1 receptor elicits ligand-independent downstream signaling
Source: PubMed Central journal article supplement — Biochem Biophys Rep. 2024 Jul 26;39:101799. doi: 10.1016/j.bbrep.2024.101799 (PMC11332076; doi:10.1016/j.bbrep.2024.101799), 2024-07-26

Supplementary Figure 1  
(Full blot of Figure 3A)

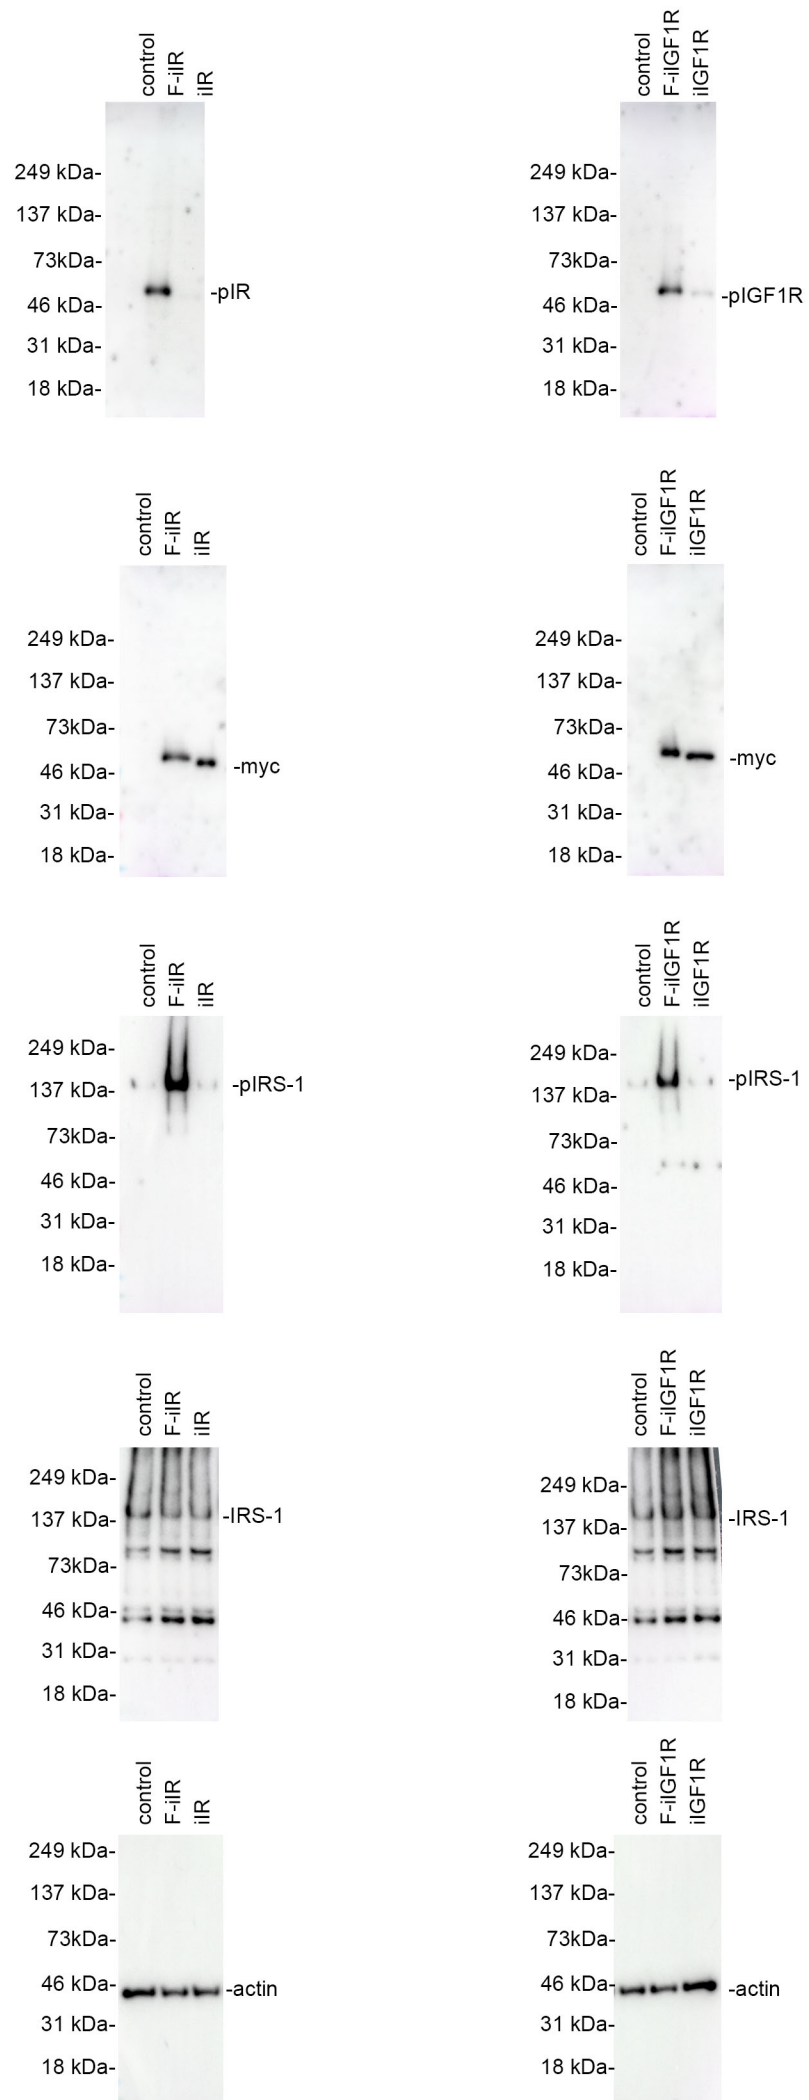

Supplementary Figure 2  
(Full blot of Figure 3B)

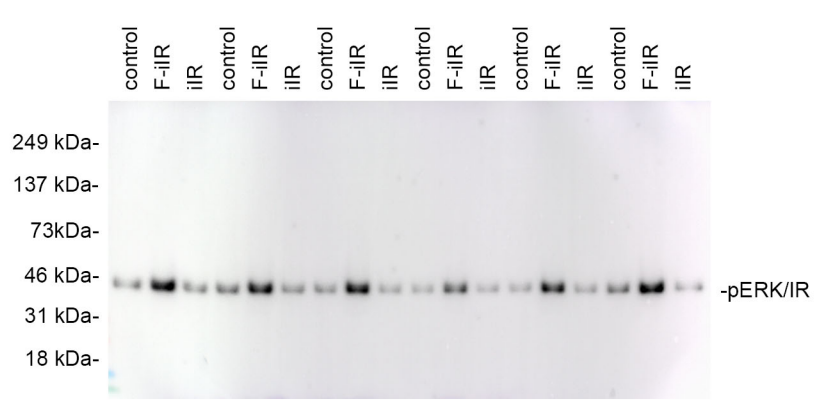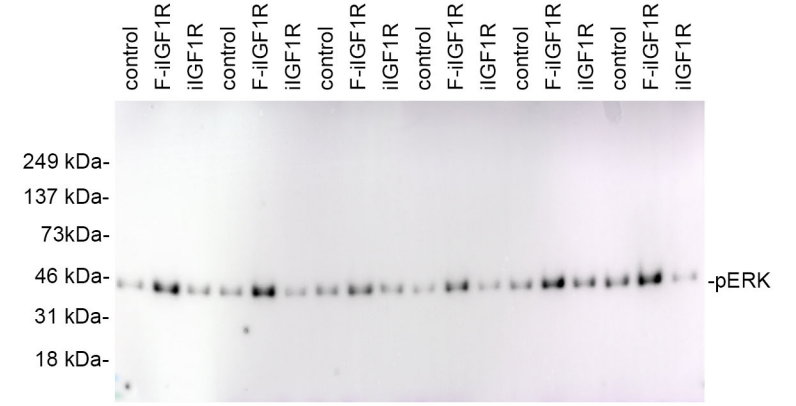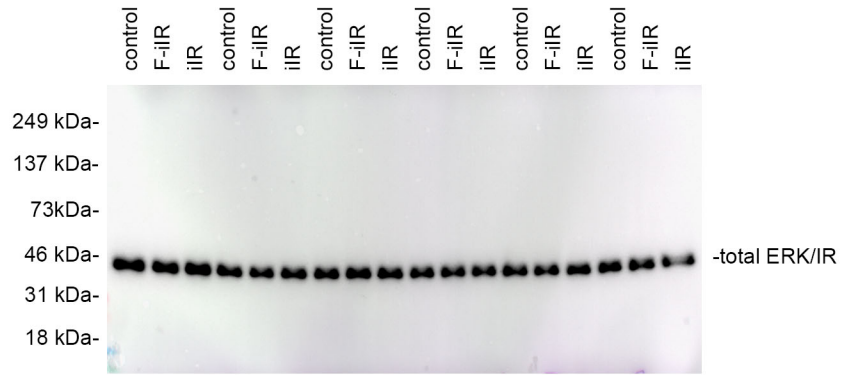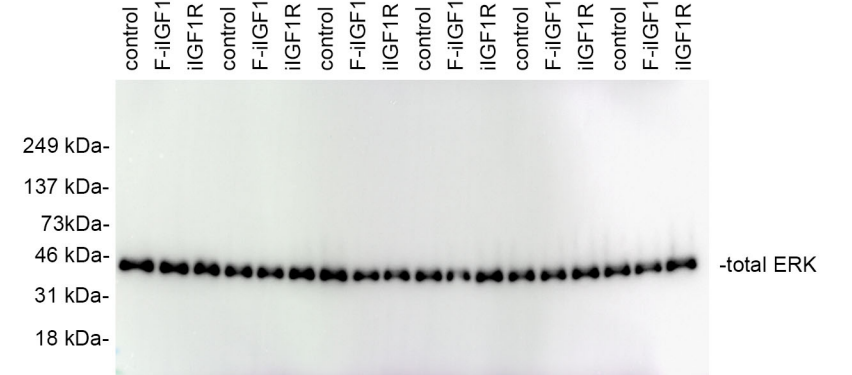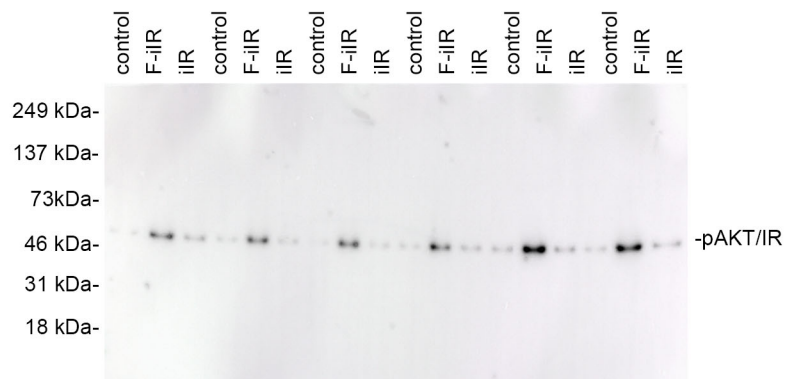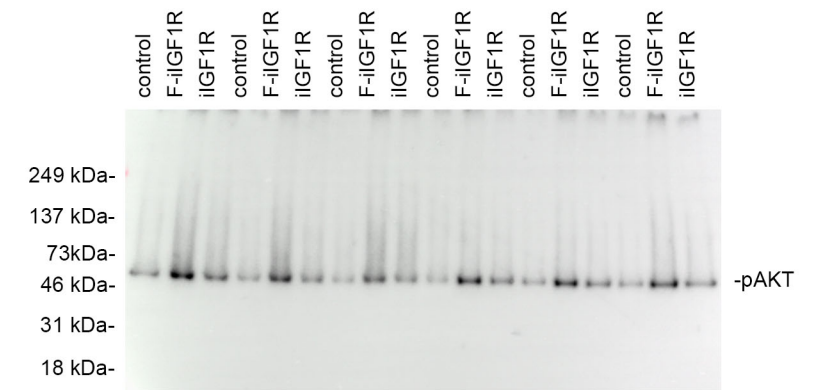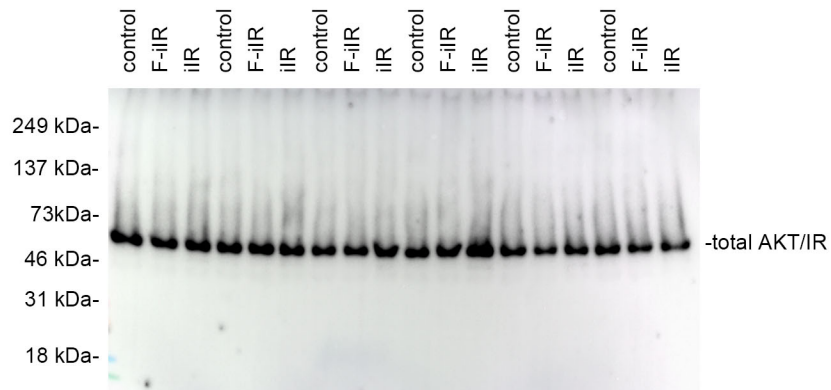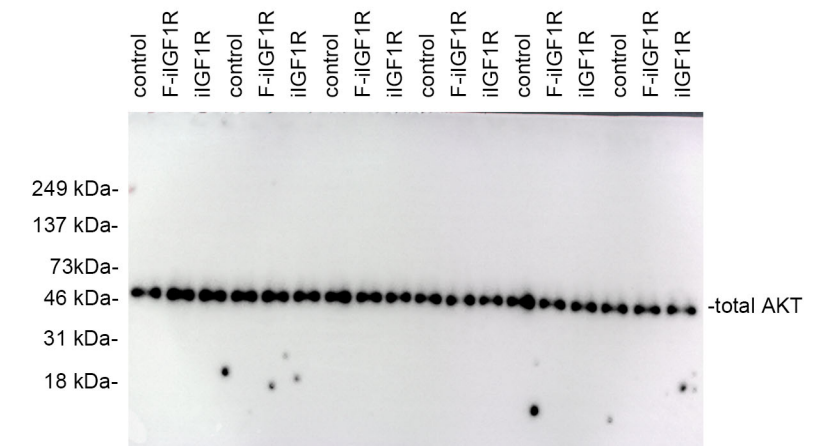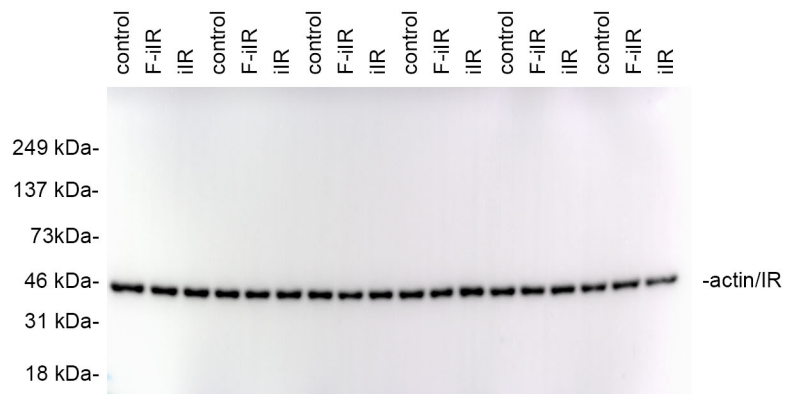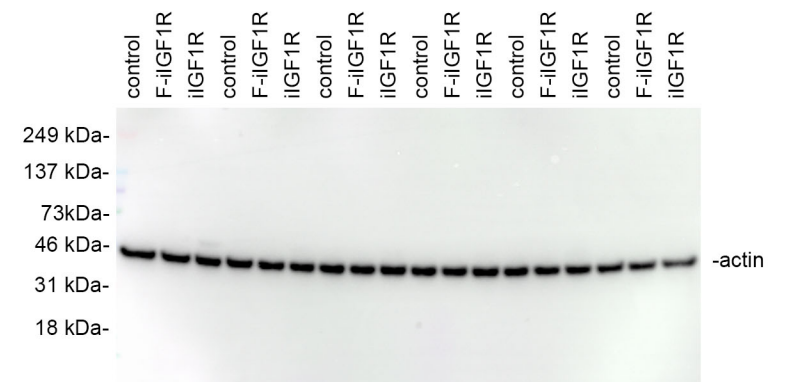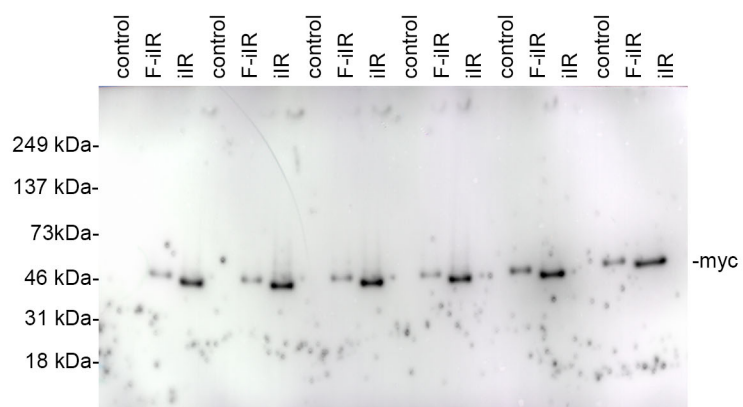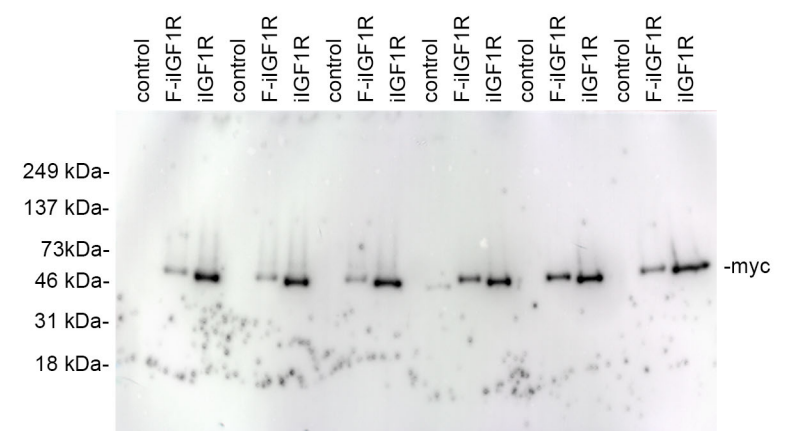

Supplement: mmc1.pdf [file mmc1.pdf]
